# Supplementary material for: Arsenene monolayer as an outstanding anode material for (Li/Na/Mg)-ion batteries: density functional theory
Source: Royal Society of Chemistry journal article supplement (doi:10.1039/c9cp03230d), 2019-01-01
Supplement: c9cp03230d1.pdf [file c9cp03230d1.pdf]

## Supporting Information

# Arsenene monolayer as an outstanding anode material for (Li/Na/Mg)-ion batteries: density functional theory

Hind Benzidi<sup>1</sup>, Marwan Lakhal<sup>1</sup>, Mourad Garara<sup>1</sup>, Mustapha Abdellaoui<sup>1</sup>, Abdelilah Benyoussef<sup>2</sup>, Abdallah El Kenz<sup>1</sup> and Omar Mounkachi<sup>1</sup>

<sup>1</sup> Laboratory of Condensed matter and Sciences Interdisciplinary (LaMCSi), B.P. 1014, Faculty of Science, Mohammed V University, Rabat, Morocco;

<sup>2</sup> 2Materials and Nanomaterials Centre, Moroccan Foundation for Advanced Science, Innovation and Research, MAScIR, Rabat, Morocco

\* Correspondence: hind.benzidi@gmail.com;

### 1) Polymorph arsenene structural details:

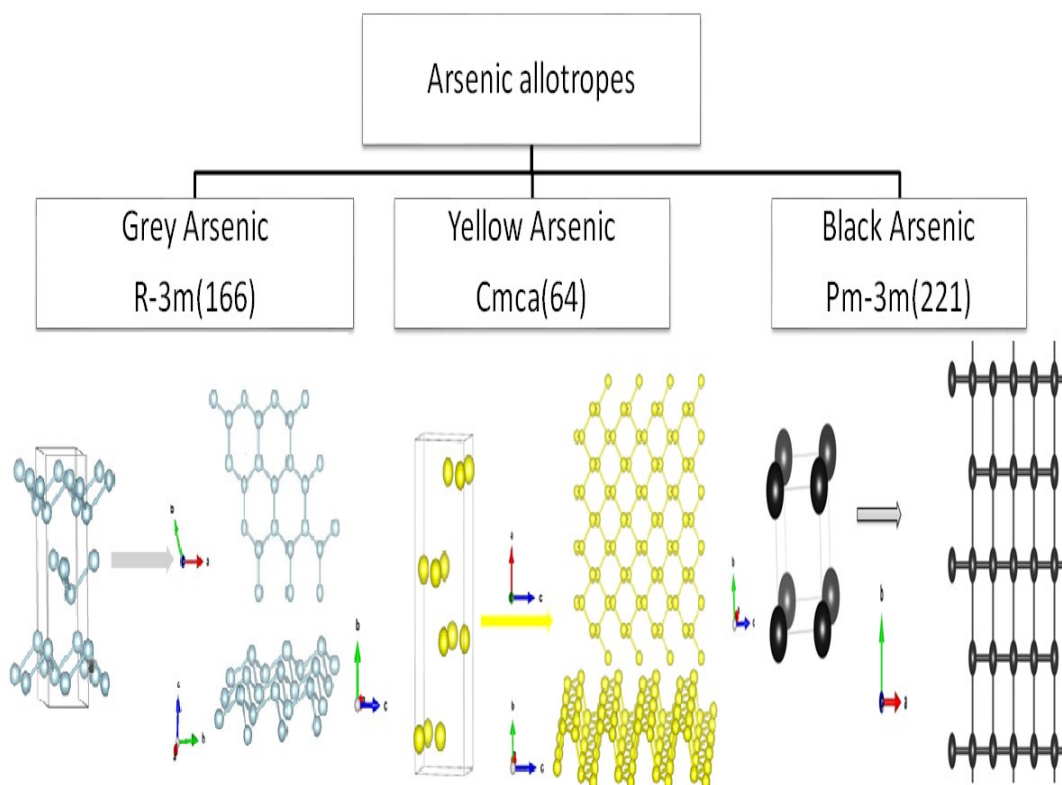

*Figure S 1 : Three most common arsenic allotropes are metallic gray, yellow, and black arsenic, with gray being the most common and stable form*

Table S 1: Calculated cohesive energies of arsenene buckling high, angles, As–As bond distances and bandgap obtained from GGA + vdW interaction included calculations.

|                | Latt. const. (Å) |          | Bond leng.<br>(Å) | Bond ang.<br>(deg) | $\Delta$<br>(Å) | $E_c$<br>(eV) | Gap<br>(eV)     |
|----------------|------------------|----------|-------------------|--------------------|-----------------|---------------|-----------------|
|                | <b>a</b>         | <b>b</b> |                   |                    |                 |               |                 |
| <b>Buckled</b> | 3,83             | 3,83     | 2,60              | 94,57              | 1,43            | -2,95         | 1,99 (Indirect) |
| <b>Puckred</b> | 4,00             | 4,48     | 2,62-2,68         | 97,584             | 2,62            | -2,89         | 0,91(Indirect)  |
| <b>Planar</b>  | 5,43             | 5,43     | 2,71              | 90                 | 0               | -2,32         | 0,19            |

After the energy minimization and geometry optimization, the obtained lattice parameters, band length,  $\Delta$  and gap are shown in Table S1.

In order to explore the stability of each structure the cohesive energy,  $E_c$ , was investigated. As it can be observed, two types of structures, buckled and puckered, are found to be stable.

## 2) Adsorption of single adatoms on arsenene

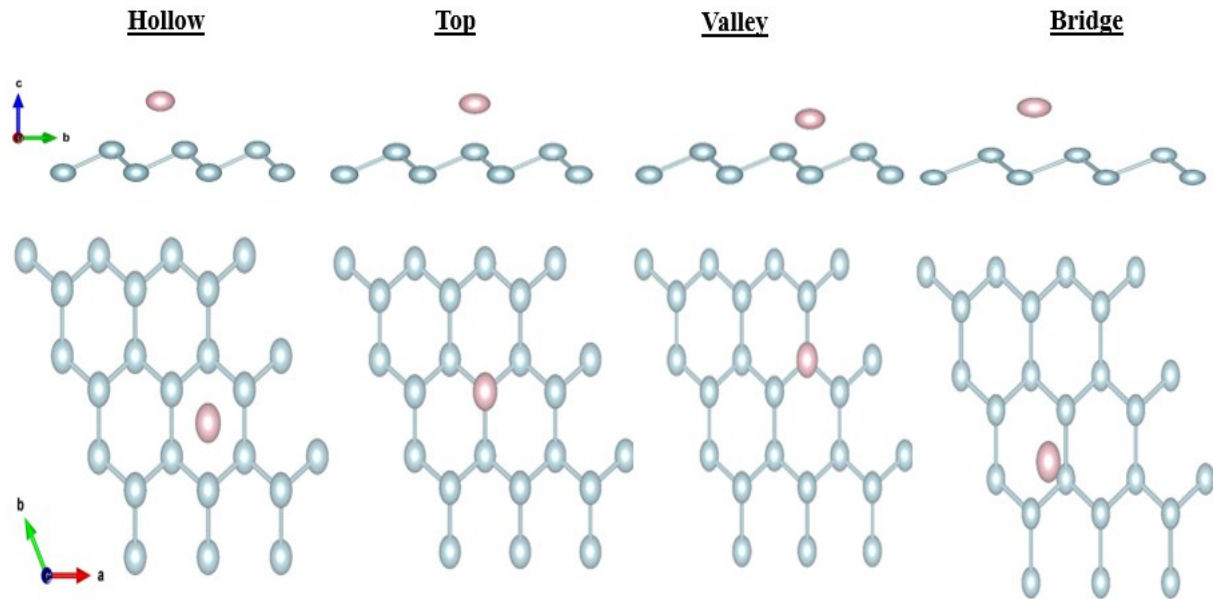

Figure S 2: Structure of arsenene nanosheet and the schematics of the possible adatoms absorption sites in top and side views.

Table S 2: Adsorption energies at different adsorption sites, vertical distance ( $h$ ) at the V-site

| Adatoms | $E_{ad}(eV)$ |        |        |           | $h(\text{\AA})$ |
|---------|--------------|--------|--------|-----------|-----------------|
|         | Arsenene     |        |        |           |                 |
|         | H            | T      | V      | B         |                 |
| Li      | -2,413       | -2,169 | -2,554 | Move to V | 1,37            |
| Na      | -1,852       | -1,472 | -1,913 | -1,827    | 2,169           |
| Mg      | -0,735       | -0,646 | -1,107 | -0,717    | 2,0117          |

Figure S1 : (a) Top and (b) side views of atomic configuration in LiAs lattice. with bond lengths and thickness

### 3) Lattice parameters and interatomic distances for $Li_xAs$ , $Na_xAs$ and $Mg_xAs$

|                            | Lattice parameters<br>( $\text{\AA}$ ) |      | bond lengths ( $\text{\AA}$ ) |      | Lattice parameter<br>change (%) |
|----------------------------|----------------------------------------|------|-------------------------------|------|---------------------------------|
|                            | a                                      | b    | As-As                         | M-As |                                 |
| <b><math>Li_xAs</math></b> |                                        |      |                               |      |                                 |
| $Li_{0,125}As$             | 3,87                                   | 3,87 | 2,65                          | 2,68 | 1,04                            |
| $Li_{0,375}As$             | 4,02                                   | 3,99 | 2,73                          | 2,66 | 4,96                            |
| $Li_{0,5}As$               | 4,05                                   | 3,97 | 2,83                          | 2,68 | 5,74                            |
| $LiAs$                     | 4,06                                   | 4,06 | 2,74                          | 2,66 | 6,01                            |
| $Li_2As$                   | 4,11                                   | 4,11 | 2,57                          | 2,59 | 7,31                            |
| $Li_3As$                   | 4,20                                   | 4,20 | 2,62                          | 2,54 | 9,66                            |
| <b><math>Na_xAs</math></b> |                                        |      |                               |      |                                 |
| $Na_{0,125}As$             | 3,89                                   | 3,36 | 2,60                          | 3,11 | 1,54                            |
| $Na_{0,25}As$              | 3,91                                   | 3,89 | 2,63                          | 3,13 | 2,05                            |
| $Na_{0,375}As$             | 3,90                                   | 3,89 | 2,61                          | 3,14 | 1,79                            |
| $Na_{0,5}As$               | 3,91                                   | 3,90 | 2,63                          | 3,16 | 2,05                            |
| $Na_{0,625}As$             | 3,90                                   | 3,89 | 2,63                          | 3,14 | 1,79                            |
| $Na_{0,75}As$              | 3,90                                   | 3,87 | 2,63                          | 3,15 | 1,79                            |
| $Na_{0,875}As$             | 3,89                                   | 3,87 | 2,73                          | 3,18 | 1,54                            |
| $NaAs$                     | 3,88                                   | 3,86 | 2,70                          | 3,17 | 1,29                            |
| $Na_{1,5}As$               | 3,79                                   | 3,27 | 2,64                          | 3,21 | -1,06                           |
| $Na_2As$                   | 3,76                                   | 3,34 | 2,62                          | 3,22 | -1,86                           |
| $Na_3As$                   | 3,81                                   | 3,83 | 3,15                          | 2,87 | -0,52                           |
| <b><math>Mg_xAs</math></b> |                                        |      |                               |      |                                 |

|                        |      |      |      |      |        |
|------------------------|------|------|------|------|--------|
| Mg <sub>0,125</sub> As | 3,84 | 3,84 | 2,58 | 3,09 | 0,26   |
| Mg <sub>0,25</sub> As  | 3,71 | 3,71 | 2,59 | 3,29 | -3,23  |
| Mg <sub>0,375</sub> As | 3,61 | 3,61 | 2,57 | 3,41 | -6,09  |
| Mg <sub>0,5</sub> As   | 3,52 | 3,52 | 2,57 | 3,55 | -8,81  |
| MgAs                   | 3,40 | 3,40 | 2,49 | 3,58 | -12,65 |
| Mg <sub>2</sub> As     | 3,83 | 3,83 | 2,62 | 3,76 | 0,00   |

Table S 3 : Calculated lattice parameters, interatomic bonds and lattice parameters change

#### 4) Magnetism behavior

Table S 4: The calculated results for the partial and total magnetic moments per unit cell

| M <sub>x</sub> As      | As ( $\mu_B$ /atom) | Magnetic moment           |                        |
|------------------------|---------------------|---------------------------|------------------------|
|                        |                     | Ad-atoms ( $\mu_B$ /atom) | Total ( $\mu_B$ /cell) |
| Li <sub>0,125</sub> As | -0,0001             | 0,0001                    | 0,00                   |
| LiAs                   | 0,0011              | -0,0018                   | -0,02                  |
| Li <sub>2,5</sub> As   | 0,0038              | -0,0034                   | 0,00                   |
| Li <sub>3</sub> As     | 0,0005              | 0,0058                    | 0,027                  |
| Na <sub>0,125</sub> As | -0,0002             | -0,0001                   | 0,00                   |
| Na <sub>0,5</sub> As   | -0,0002             | -0,0001                   | 0,00                   |
| NaAs                   | -0,0000             | 0,0000                    | 0,00                   |
| Na <sub>2</sub> As     | -0,0001             | 0,0000                    | 0,00                   |
| Mg <sub>0,125</sub> As | -0,0002             | -0,0026                   | 0,00                   |
| Mg <sub>0,5</sub> As   | 0,0000              | 0,0000                    | 0,00                   |
| MgAs                   | 0,0054              | 0,0078                    | 0,03                   |
| Mg <sub>2</sub> As     | -0,0075             | -0,0239                   | -0,08                  |

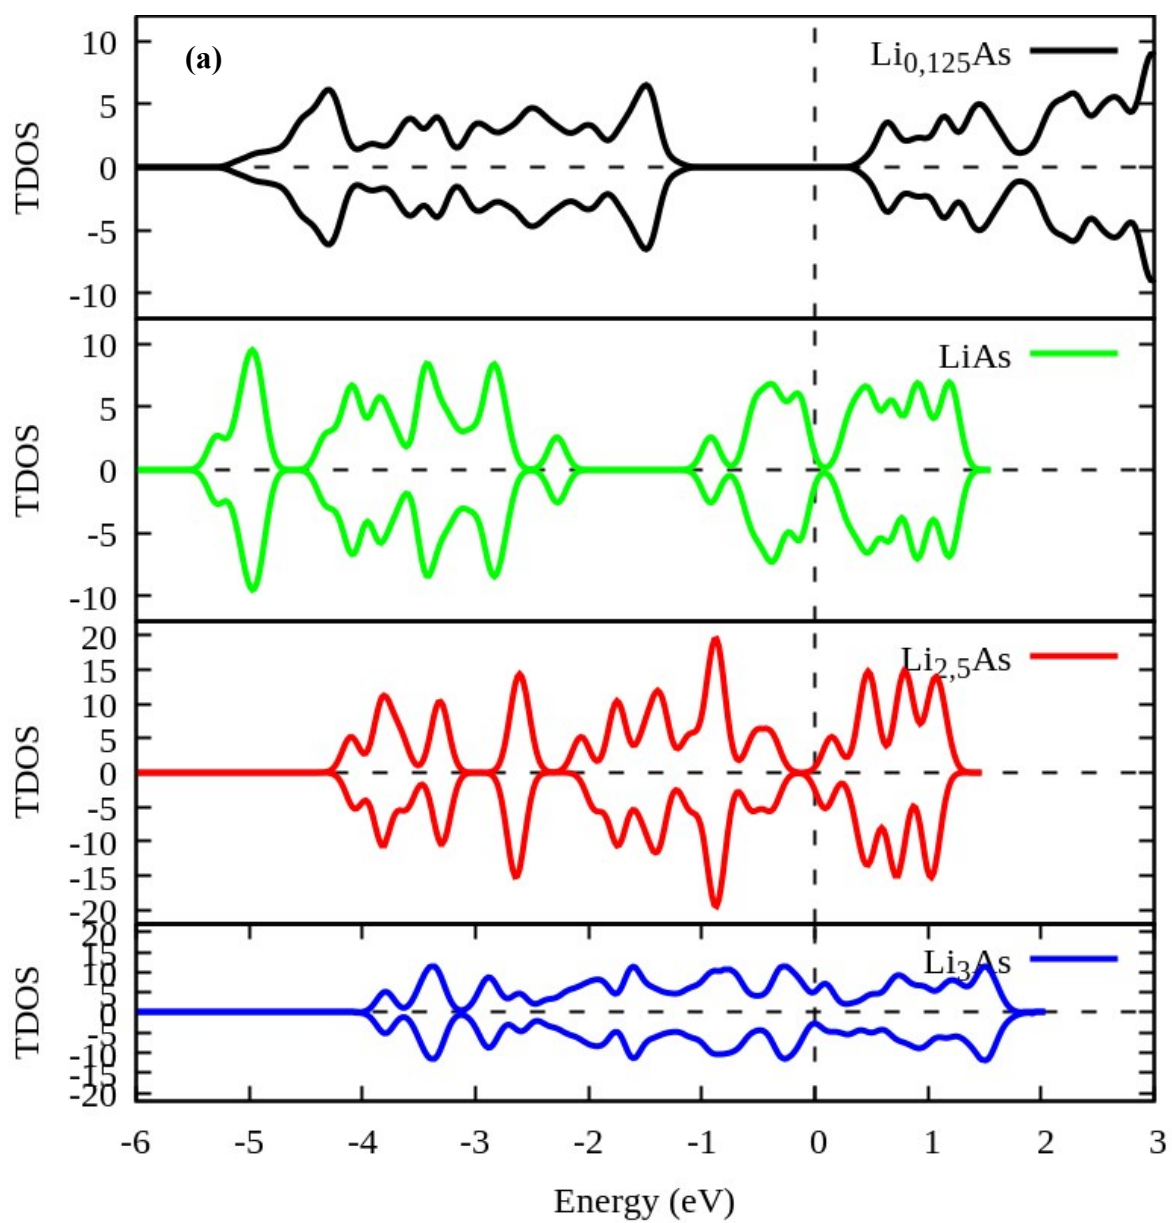

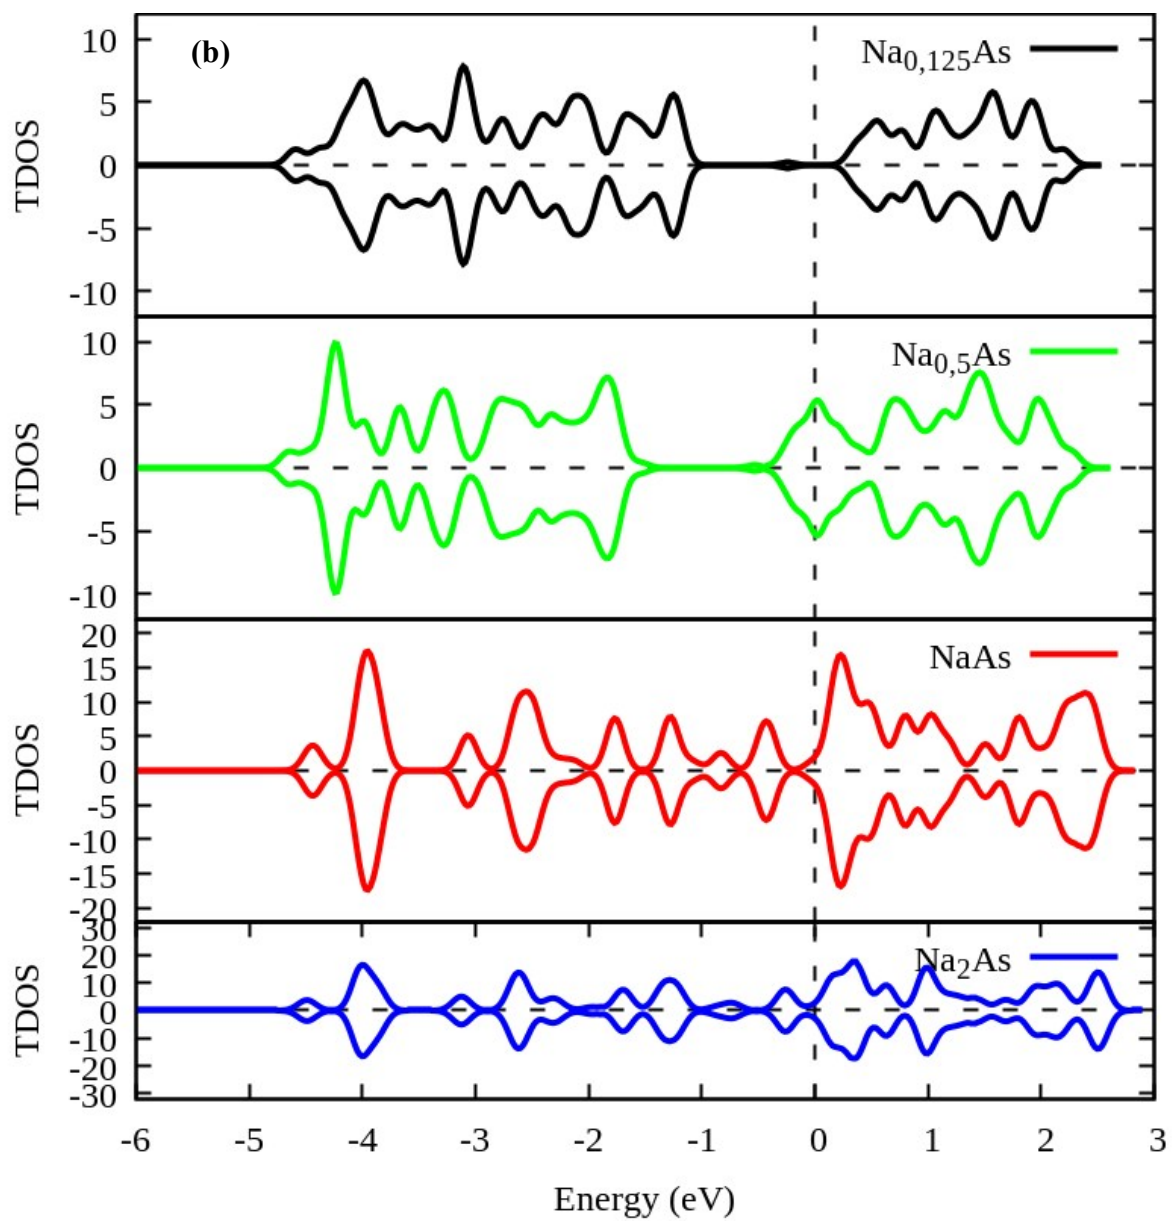

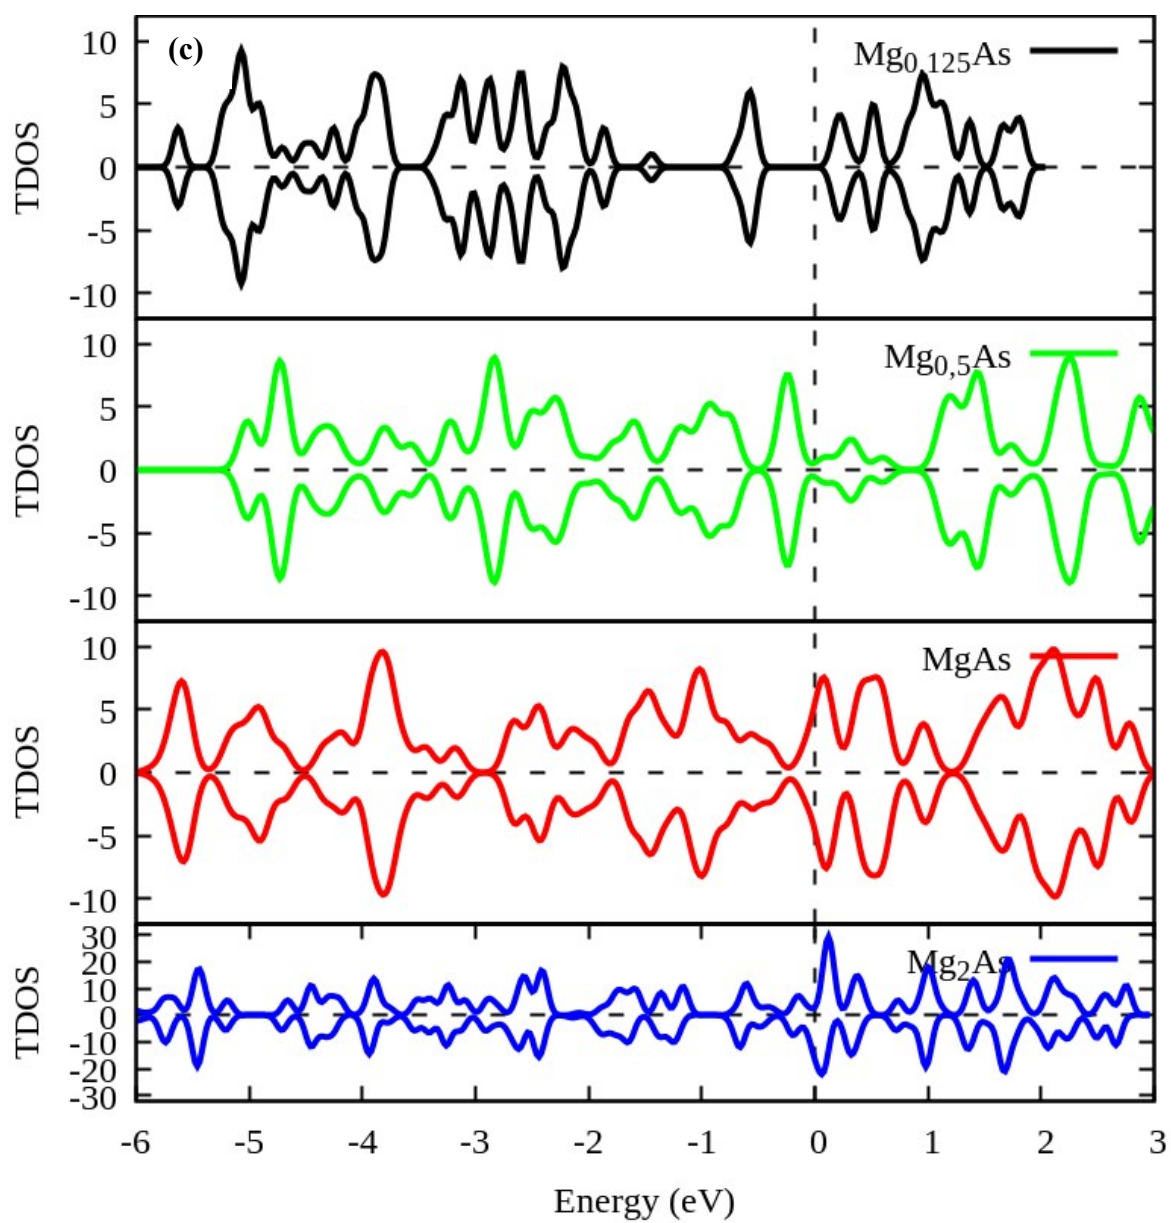

Figure S 3: Total density of states (DOS) of  $Li_xAs$ ,  $Na_xAs$ , and  $Mg_xAs$ . (The Fermi level is aligned to 0.)
